# Supplementary material for: Bullying in children: impact on child health
Source: PubMed Central journal article supplement — BMJ Paediatr Open. 2021 Mar 11;5(1):e000939. doi: 10.1136/bmjpo-2020-000939 (PMC7957129; doi:10.1136/bmjpo-2020-000939), 2021-03-11
Supplement: bmjpo-2020-000939.draft_revisions.pdf [file bmjpo-2020-000939.draft_revisions.pdf]

# BMJ Paediatrics Open

BMJ Paediatrics Open is committed to open peer review. As part of this commitment we make the peer review history of every article we publish publicly available.

When an article is published we post the peer reviewers' comments and the authors' responses online. We also post the versions of the paper that were used during peer review. These are the versions that the peer review comments apply to.

The versions of the paper that follow are the versions that were submitted during the peer review process. They are not the versions of record or the final published versions. They should not be cited or distributed as the published version of this manuscript.

BMJ Paediatrics Open is an open access journal and the full, final, typeset and author-corrected version of record of the manuscript is available on our site with no access controls, subscription charges or pay-per-view fees (<http://bmjpaedsopen.bmj.com>).

If you have any questions on BMJ Paediatrics Open's open peer review process please email [info.bmjpo@bmj.com](mailto:info.bmjpo@bmj.com)

# BMJ Paediatrics Open

## Bullying in children: impact on child health

|                               |                                                                                                                  |
|-------------------------------|------------------------------------------------------------------------------------------------------------------|
| Journal:                      | <i>BMJ Paediatrics Open</i>                                                                                      |
| Manuscript ID                 | bmjpo-2020-000939                                                                                                |
| Article Type:                 | Review                                                                                                           |
| Date Submitted by the Author: | 04-Dec-2020                                                                                                      |
| Complete List of Authors:     | Armitage, Richard ; Division of Epidemiology and Public Health, University of Nottingham, Nottingham NG7 2RD, UK |
| Keywords:                     | Adolescent Health, Child Psychiatry, Psychology                                                                  |
|                               |                                                                                                                  |

SCHOLARONE™  
Manuscripts

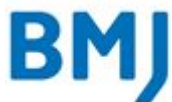

I, the Submitting Author has the right to grant and does grant on behalf of all authors of the Work (as defined in the below author licence), an exclusive licence and/or a non-exclusive licence for contributions from authors who are: i) UK Crown employees; ii) where BMJ has agreed a CC-BY licence shall apply, and/or iii) in accordance with the terms applicable for US Federal Government officers or employees acting as part of their official duties; on a worldwide, perpetual, irrevocable, royalty-free basis to BMJ Publishing Group Ltd ("BMJ") its licensees and where the relevant Journal is co-owned by BMJ to the co-owners of the Journal, to publish the Work in this journal and any other BMJ products and to exploit all rights, as set out in our [licence](#).

The Submitting Author accepts and understands that any supply made under these terms is made by BMJ to the Submitting Author unless you are acting as an employee on behalf of your employer or a postgraduate student of an affiliated institution which is paying any applicable article publishing charge ("APC") for Open Access articles. Where the Submitting Author wishes to make the Work available on an Open Access basis (and intends to pay the relevant APC), the terms of reuse of such Open Access shall be governed by a Creative Commons licence – details of these licences and which [Creative Commons](#) licence will apply to this Work are set out in our licence referred to above.

Other than as permitted in any relevant BMJ Author's Self Archiving Policies, I confirm this Work has not been accepted for publication elsewhere, is not being considered for publication elsewhere and does not duplicate material already published. I confirm all authors consent to publication of this Work and authorise the granting of this licence.

**Title**

Bullying in children: impact on child health

**Corresponding author**

Dr Richard Armitage

Division of Epidemiology & Public Health, University of Nottingham, Nottingham City

Hospital, Hucknall Road, Nottingham, NG5 1PB, UK

msxra37@nottingham.ac.uk

+44(0)7765065860

**Keywords**

Bullying

Cyber Bullying

Children's Health

**Word count**

2506

**Reference count**

58

## Abstract

Bullying in childhood is a major public health problem that increases the risk of poor health, social, and educational outcomes in childhood and adolescence. These consequences are felt by all those involved in bullying (bullies, victims, and bully-victims), and are now recognised to propagate deep into adulthood. Cyberbullying is a relatively new type of bullying in addition to the traditional forms of direct physical, direct verbal, and indirect bullying. Children who are perceived as being 'different' in any way are at greater risk of victimisation, with physical appearance being the most frequent trigger of childhood bullying. Globally, one in three children have been bullied in the past 30 days, although there is substantial regional variation in the prevalence and type of bullying experienced. The consequences of childhood bullying can be categorised into three broad categories: educational consequences during childhood, health consequences during childhood, and all consequences during adulthood. Many dose-response relationships exist between the frequency and intensity of bullying experienced and the severity of negative health consequence reported. The majority of victims of cyberbullying are also victims of traditional bullying, meaning cyberbullying creates very few additional victims. Overall, adverse mental health outcomes due to bullying in childhood most severely impact on bully-victims. Bullying prevention is vital for the achievement of the Sustainable Development Goals, with whole-school cooperative learning interventions having the strongest evidence base for successful outcomes. Clear management and referral pathways for health professionals dealing with childhood bullying are lacking in both primary and secondary care, although specialist services are available locally and online.

## Key messages

- Bullying in childhood is a global public health problem that impacts on child, adolescent and adult health
- Bullying exists in its traditional, sexual, and cyber forms, all of which impact on the physical, mental and social health of victims, bullies, and bully-victims
- Children perceived as 'different' in any way are at greater risk of victimisation
- Bullying is extremely prevalent: one in three children globally has been victimised in the preceding month
- Existing bullying prevention interventions are rarely evidence-based and alternative approaches are urgently needed

## Introduction

Bullying in childhood has been classified by the World Health Organization (WHO) as a major public health problem,<sup>1</sup> and for decades has been known to increase the risk of poor health, social, and educational outcomes in childhood and adolescence.<sup>2</sup> Characterised by repeated victimisation within a power-imbalanced relationship, bullying encompasses a wide range of types, frequencies, and aggression levels, ranging from teasing and name-calling to physical, verbal, and social abuse.<sup>3</sup> The dynamics within such relationships become consolidated with repeated and sustained episodes of bullying: bullies accrue compounding power while victims are stripped of their own and become progressively less able to defend themselves and increasingly vulnerable to psychological distress.<sup>4</sup>

1  
2  
3 However, only in the last decade have prospective studies been published that reveal  
4 the far-reaching effects of childhood bullying that extend into adulthood. There is now  
5 substantial evidence that being bullied as a child or adolescent has a causal  
6 relationship to the development of mental health issues beyond the early years of life,  
7 including depression, anxiety, and suicidality.<sup>5</sup> As such, addressing the global public  
8 health problem of bullying in childhood has received increasing international attention  
9 and is vital for the achievement of Sustainable Development Goal 4.<sup>6</sup> The impact of  
10 the COVID-19 pandemic on child health and education has focussed further attention  
11 on bullying in its digital form, so-called 'cyberbullying,' the prevalence of which is  
12 feared to be increasing.<sup>7</sup>

### 28 29 Types of bullying

30  
31  
32  
33 Participants in childhood bullying take up one of three roles: the victim, the bully (or  
34 perpetrator), or the bully-victim (who is both a perpetrator and a victim of bullying).<sup>5</sup>  
35  
36 Victims and bullies either belong to the same peer group (peer bullying), or the same  
37 family unit (sibling bullying),<sup>8</sup> although bullying frequently occurs in multiple settings  
38 simultaneously, such as at school (peer bullying) and in the home (sibling bullying),  
39 representing a ubiquitous ecology of bullying that permeates the child's life.

40  
41  
42  
43  
44  
45  
46  
47  
48  
49 Three main types of bullying are observed, the typical characteristics of which are  
50 illustrated in Table 1.

51  
52  
53  
54  
55  
56 **Table 1. Typical characteristics of the main types of childhood bullying**

| <u>Types</u>         | <u>Typical characteristics</u>                                                                                        | <u>Examples</u>                                                                                                               | <u>Reference</u> |
|----------------------|-----------------------------------------------------------------------------------------------------------------------|-------------------------------------------------------------------------------------------------------------------------------|------------------|
| Traditional bullying | Direct physical (overt physical aggression or assaults)                                                               | Pushing, punching and kicking                                                                                                 | 9                |
|                      | Direct verbal (overt verbal attacks that are highly personal)                                                         | Teasing, taunting, or threatening behaviour directed at the victim's appearance, abilities, family, culture, race or religion |                  |
|                      | Indirect (covert behaviour that damages peer relationships, self-esteem or social status)                             | Passing nasty notes, offensive graffiti, and defacing or damaging personal property                                           |                  |
| Sexual bullying      | Sexually bothering another person (may also be referred to as 'sexual harassment')                                    | Inappropriate and unwanted touching, using sexualised language, and pressurising another to act promiscuously                 | 10               |
| Cyberbullying        | Aggressive behaviour delivered through digital technology, specifically mobile phones, the internet, and social media | Spreading false stories about a victim online, posting digital media featuring a victim online without permission             | 11               |

While traditional bullying has been recognised and studied for many decades,<sup>12</sup> and is often accepted as an inevitable aspect of a normal childhood,<sup>3</sup> cyberbullying represents a relatively new phenomenon in which childhood bullying now takes place through digital modalities. The widespread uptake of electronic devices has reached almost complete saturation amongst adolescents in high-income countries, with users checking their devices hundreds of times and for hours each day.<sup>13</sup> While providing beneficial access to information and social support, this large and growing online exposure of young people renders them vulnerable to exploitation, gambling, and grooming by criminals and sexual abusers, as well as cyberbullying.<sup>14</sup> Due to the



increased potential for large audiences, anonymous attacks, and the permanence of posted messages, coupled with lower levels of direct feedback, reduced time and space limits, and decreased adult supervision, it is feared that cyberbullying may pose a greater threat to child and adolescent health than traditional bullying modalities.<sup>15</sup>

### Factors that influence bullying

Two large-scale international surveys regularly conducted by the WHO – the Global School-based Student Health Survey (GSHS)<sup>16</sup> and the Health Behaviour in School-aged Children (HBSC) study<sup>17</sup> – provide data from 144 countries and territories in all regions of the world. These data identify specific factors that strongly influence the type, frequency, and severity of bullying experienced by children and adolescents globally. These factors, which are briefly described in Table 2, suggest that children who are perceived as being ‘different’ in any way are at greater risk of victimisation.

**Table 2. Summary of factors that influence child and adolescent bullying<sup>18</sup>**

| <u>Influencing factor</u> | <u>Description</u>                                                                                                                             |
|---------------------------|------------------------------------------------------------------------------------------------------------------------------------------------|
| Sex differences           | Globally, girls and boys are equally likely to experience bullying.                                                                            |
|                           | Boys are more likely to experience direct physical bullying; girls are more likely to experience direct verbal and indirect bullying.          |
|                           | Girls are more likely than boys to experience bullying based on physical appearance.                                                           |
|                           | Globally, there are no major differences in the extent to which girls and boys experience sexual bullying, but there are regional differences. |

|                                |                                                                                                                                                                                   |
|--------------------------------|-----------------------------------------------------------------------------------------------------------------------------------------------------------------------------------|
|                                | Girls are more likely than boys to be cyberbullied via digital messages, but there is less discrepancy between the sexes in the prevalence of cyberbullying via digital pictures. |
| Age differences                | As children grow older, they are less likely to experience bullying by peers.                                                                                                     |
|                                | Age differences are less pronounced for bullying perpetration.                                                                                                                    |
|                                | Older children may be more exposed to cyberbullying.                                                                                                                              |
| Not conforming to gender norms | Children viewed as gender non-conforming are at higher risk of bullying.                                                                                                          |
| Physical appearance            | Physical appearance is the most frequent reason for bullying.                                                                                                                     |
|                                | Body dissatisfaction and being overweight are associated with bullying.                                                                                                           |
| Race, nationality or colour    | Bullying based on race, nationality or colour is the second most frequent reason for bullying reported by children.                                                               |
| Religion                       | Compared to other factors, religion is mentioned by far fewer children as a reason for being bullied.                                                                             |
| Socio-economic status          | Socio-economic disadvantage is associated with increased risk of being bullied.                                                                                                   |
|                                | A similar relationship is seen between self-perceived social status and cyberbullying.                                                                                            |
| Migration status               | Immigrant children are more likely to be bullied than their native-born peers.                                                                                                    |
| School environment             | A positive school environment reduces bullying.                                                                                                                                   |
| Peer and family support        | Family support and communication can be an important protective factor.                                                                                                           |

## Prevalence of bullying

A 2019 report from the United Nations Educational, Scientific and Cultural Organization (UNESCO),<sup>18</sup> examined the global prevalence of bullying in childhood and adolescence using data from the GSHS and HBSC studies along with addition

1  
2  
3 data from the Progress in International Reading Literacy Study (PIRLS)<sup>19</sup> and  
4 Programme for International Students Assessment (PISA).<sup>20</sup> It found that almost one  
5  
6 in three (32%) children globally has been the victim of bullying on one or more days in  
7  
8 the preceding month, and that one in 13 (7.3%) has been bullied on six or more days  
9  
10 over the same period.<sup>18</sup> However, there is substantial regional variation in the  
11  
12 prevalence of bullying across the world, ranging from 22.8% of children being  
13  
14 victimised in Central America, through 25.0% and 31.7% in Europe and North America  
15  
16 respectively, to 48.2% in Sub-Saharan Africa. There is also significant geographical  
17  
18 variation in the type of bullying reported, with direct physical and sexual bullying being  
19  
20 dominant in low- and middle-income countries, and indirect bullying being the most  
21  
22 frequent type in high-income regions. Nevertheless, bullying is a sizeable public  
23  
24 health problem of truly global importance.  
25  
26  
27  
28  
29  
30  
31  
32

33 Encouragingly, there has been a decrease in the prevalence of bullying in half (50.0%)  
34  
35 of countries since 2002, while 31.4% have seen no significant change over this  
36  
37 timeframe.<sup>18</sup> However, 18.6% of countries have witnessed an increase in childhood  
38  
39 bullying, primarily amongst members of one sex or the other, although in both girls  
40  
41 and boys in North Africa, Sub-Saharan Africa, Myanmar, the Philippines, and United  
42  
43 Arab Emirates.<sup>18</sup>  
44  
45  
46  
47  
48

49 Since its appearance, cyberbullying has received substantial media attention claiming  
50  
51 that the near-ubiquitous uptake of social media amongst adolescents has induced a  
52  
53 tidal wave of online victimisation and triggered multiple high-profile suicides amongst  
54  
55 adolescents after being bullied online.<sup>21,22</sup> However, a recent meta-analysis suggests  
56  
57 that cyberbullying is far less prevalent than bullying in its traditional forms, with rates  
58  
59  
60

1  
2  
3 of online victimisation less than half of those offline.<sup>23</sup> The study also found relatively  
4 strong correlations between bullying in its traditional and cyber varieties, suggesting  
5 victims of online bullying are also likely to be bullied offline, and that that these different  
6 forms of victimisation reflect alternative methods of enacting the same perpetrator  
7 behaviour. Recent evidence from England also indicates difference between sexes,  
8 with one in 20 adolescent girls and one in 50 adolescent boys reporting cyberbully  
9 victimisation over the previous two months.<sup>24</sup>

## 10 11 12 13 14 15 16 17 18 19 20 21 22 Consequences of bullying

23  
24  
25  
26  
27 There is a vast range of possible consequences of bullying in childhood, determined  
28 by multiple factors including the frequency, severity, and type of bullying, the role of  
29 the participant (victim, bully, or bully-victim), and the timing at which the consequences  
30 are observed (during childhood, adolescence, or adulthood). The consequences can  
31 be categorised into three broad categories: educational consequences during  
32 childhood and adolescence, health consequences during childhood and adolescence,  
33 and all consequences during adulthood. Each will now be discussed individually.

### 34 35 36 37 38 39 40 41 42 43 44 45 **Educational consequences during childhood and adolescence**

46  
47 Children who are frequently bullied are more likely to feel like an outsider at school,<sup>20</sup>  
48 while indirect bullying specifically has been shown to have a negative effect on  
49 socialisation and feelings of acceptance amongst children in schools.<sup>25</sup> Accordingly,  
50 a child's sense of belonging at school increases as bullying decreases.<sup>19</sup> In addition,  
51 being bullied can affect continued engagement in education. Compared with those  
52 who are not bullied, children who are frequently bullied are nearly twice as likely to  
53  
54  
55  
56  
57  
58  
59  
60

regularly skip school, and are more likely to want to leave school after finishing secondary education.<sup>20</sup> The effect of frequent bullying on these educational consequences is illustrated in Table 3.

**Table 3. Relationship between being frequently bullied and educational consequences<sup>20</sup>**

| <u>Consequence</u>                                         | <u>Not frequently bullied</u> | <u>Frequently bullied</u> |
|------------------------------------------------------------|-------------------------------|---------------------------|
| Feeling like an outsider (or left out of things at school) | 14.9%                         | 42.4%                     |
| Feeling anxious for a test even if well prepared           | 54.6%                         | 63.9%                     |
| Skipped school at least 3-4 days in previous two weeks     | 4.1%                          | 9.2%                      |
| Expected to end education at the secondary level           | 34.8%                         | 44.5%                     |

Children who are bullied score lower in tests than those who are not. For example, in 15 Latin American countries, the test scores of bullied children were 2.1% lower in mathematics and 2.5% lower in reading than non-bullied children.<sup>25</sup> Compared with children never or almost never bullied, average learning achievement scores were 2.7% lower in children bullied monthly, and 7.5% lower in children bullied weekly, indicating a dose-response relationship. These findings are globally consistent across both low- and high-income countries.<sup>20</sup>

### **Health consequences during childhood and adolescence**

Numerous meta-analyses,<sup>2,26,27,28,29</sup> longitudinal studies,<sup>5,30,31</sup> and cross-sectional studies<sup>32,33,34</sup> have demonstrated strong relationships between childhood bullying and physical, mental, and social health outcomes in victims, bullies, and bully-victims. Some of these consequences are illustrated in Table 4. Reported physical health outcomes are mostly psychosomatic in nature. Most studies focused on the impacts

on victims, although adverse effects on bullies and bully-victims are also recognised. Many studies identified a dose-response relationship between the frequency and intensity of bullying experienced and the severity of negative health consequence reported.

**Table 4. Summary of childhood health consequences of bullying during childhood**

|                                    | <u>Experienced by</u> |              |                          | <u>Reference</u> |
|------------------------------------|-----------------------|--------------|--------------------------|------------------|
|                                    | <u>Victim</u>         | <u>Bully</u> | <u>Bully-<br/>victim</u> |                  |
| <b>Physical health outcomes</b>    |                       |              |                          |                  |
| Unspecified psychosomatic symptoms | x                     |              |                          | 27               |
| Feeling tired                      | x                     |              |                          | 27               |
| Poor appetite                      | x                     |              |                          | 27               |
| Stomach ache                       | x                     |              |                          | 27               |
| Sleeping difficulties              | x                     |              |                          | 27               |
| Headache                           | x                     |              |                          | 27               |
| Back pain                          | x                     |              |                          | 27               |
| Dizziness                          | x                     |              |                          | 27               |
| <b>Mental health outcomes</b>      |                       |              |                          |                  |
| Depression                         | x                     |              | x                        | 2,5              |
| Anxiety                            | x                     |              | x                        | 2,5,26           |
| Psychotic symptoms                 | x                     |              |                          | 27,31            |
| Self-harm                          | x                     |              |                          | 30               |
| Suicidal ideation                  | x                     | x            | x                        | 5,27,28,29       |
| Suicidal behaviour                 | x                     | x            | x                        | 27,28,29         |

|                               |   |   |   |          |
|-------------------------------|---|---|---|----------|
| Illicit substance misuse      | x |   |   | 26,27    |
| Alcohol misuse                | x | x |   | 26,27,32 |
| Smoking                       | x | x | x | 32       |
| Panic disorder                | x |   | x | 5,27     |
| Loneliness                    | x |   | x | 2,32     |
| Low self-esteem               | x |   |   | 2        |
| Hyperactivity                 |   |   | x | 26       |
| Disturbed personality         |   | x | x | 5,26     |
| <b>Social health outcomes</b> |   |   |   |          |
| Isolation                     |   |   | x | 26       |
| Poor school adjustment        |   | x |   | 26       |
| Poor social adjustment        |   |   | x | 26       |
| Externalising problems        |   | x |   | 26       |
| Risky sexual behaviour        | x |   |   | 27       |
| Weapon carrying               | x | x |   | 33       |
| Disconnectedness with parents | x |   |   | 34       |

While there is significant regional variation, the association between childhood bullying and suicidal ideation and behaviour are recognised globally.<sup>35</sup> Alarming, childhood bully victimisation is associated with a risk of mental health problems similar to that experienced by children in public or substitute care.<sup>36</sup> Victimisation in sibling bullying is associated with substantial emotional problems in childhood including low self-esteem, depression and self-harm,<sup>8</sup> and increases the risk of further victimisation through peer bullying. Overall, adverse mental health outcomes due to bullying in

childhood appear to most severely impact on bully-victims, followed by victims and bullies.<sup>5,37</sup>

9 out of 10 adolescents who report victimisation by cyberbullying are also victims of bullying in its traditional forms,<sup>38</sup> meaning cyberbullying creates very few additional victims,<sup>39</sup> but is another weapon in the bully's arsenal and has not replaced traditional methods.<sup>40</sup> Cyberbullying victimisation appears to be an independent risk factors for mental health problems only in girls, and is not associated with suicidal ideation in either sex.<sup>41</sup> As such, traditional bullying is still the major type of bullying associated with poor mental health outcomes in children and adolescents.<sup>24</sup>

### Consequences during adulthood

A recent meta-analysis<sup>42</sup> and numerous other prospective longitudinal studies<sup>5,36,43,44</sup> that used large, population-based, community samples analysed through quantitative methods suggest that childhood bullying can lead to three main negative outcomes in adulthood for victims, bullies, and bully-victims: psychopathology, suicidality, and criminality. Some of these consequences are illustrated in Table 5.

**Table 5. Summary of adulthood consequences of bullying during childhood**

|                        | Experienced by |       |              | Reference  |
|------------------------|----------------|-------|--------------|------------|
|                        | Victim         | Bully | Bully-victim |            |
| <b>Psychopathology</b> |                |       |              |            |
| Depression             | x              | x     | x            | 5,36,43,44 |
| Anxiety                | x              | x     | x            | 5, 36,43   |



|                       |   |   |   |         |
|-----------------------|---|---|---|---------|
| Panic disorder        | x | x | x | 5,43    |
| Disturbed personality |   | x |   | 5       |
| <b>Suicidality</b>    | x | x | x | 5,36,43 |
| <b>Criminality</b>    |   |   |   | 42      |
| Violent crime         |   | x | x | 42      |
| Illicit drug misuse   |   | x | x | 42      |

A strong dose-response relationship exists between frequency of peer victimisation in childhood and adolescence and the risk of adulthood adversities.<sup>42</sup> For example, frequently bullied adolescents are twice as likely to develop depression in early adulthood compared with non-victimised peers, and is seen in both males and females.<sup>44</sup> Startlingly, the effects of this dose-response relationship seems to persist until at least 50 years of age.<sup>36</sup>

The impact of childhood bully victimisation on adulthood mental health outcomes is staggering. Approximately 29% of the adulthood depression burden could be attributed to victimisation by peers in adolescence,<sup>44</sup> and bully victimisation by peers is thought to have a greater impact on adult mental health than maltreatment by adults, including sexual and physical abuse.<sup>45</sup> Finally, these consequences reach beyond the realm of health, as childhood bullying victimisation is associated with a lack of social relationships, economic hardship, and poor perceived quality of life at age 50.<sup>36</sup>

### Bullying prevention

1  
2  
3 Until not long ago, being bullied was considered a normal rite of passage through  
4 which children must simply persevere.<sup>3</sup> However, the size and scale of its impact on  
5 child health, and later on adulthood health, is now clearly understood and renders it a  
6 significant public health problem warranting urgent attention.<sup>1</sup> While parental and peer  
7 support are known to be protective against victimisation, regardless of global location,  
8 cultural norms or socioeconomic status,<sup>46</sup> structured programmes have been  
9 deployed at scale to prevent victimisation and its associated problems.

10  
11  
12 School-based interventions have been shown to significantly reduce bullying  
13 behaviour in children and adolescents. Whole-school approaches incorporating  
14 multiple disciplines and high levels of staff engagement provide the greatest potential  
15 for successful outcomes, while curriculum-based and targeted social skills training are  
16 less effective methods that may even worsen victimisation.<sup>47</sup> The most widely  
17 adopted approach is the Olweus Bullying Prevention Program (OBPP), a  
18 comprehensive, school-wide programme designed to reduce bullying and achieve  
19 better peer relations among school-aged children.<sup>12</sup> However, despite its broad global  
20 uptake, meta-analyses of studies examining the effectiveness of the OBPP have  
21 shown mixed results across different cultures.<sup>48,49,50</sup>

22  
23  
24 Cooperative learning, in which teachers increase opportunities for positive peer  
25 interaction through carefully structured, group-based learning activities in schools, is  
26 an alternative approach to bullying prevention that has recently gained traction and  
27 been shown to significantly reduced bullying and its associated emotional problems  
28 while enhancing student engagement and educational achievement.<sup>51</sup>

1  
2  
3 Due to the link between sibling and peer bullying, there have been calls for bullying  
4 prevention interventions to be developed and made available to start in the home, and  
5  
6 for general practitioners and paediatricians to routinely enquire about sibling bullying.<sup>8</sup>  
7  
8  
9

10  
11  
12 While countless cyberbullying prevention programmes, both off- and online, are  
13 marketed to educational institutions, only a small proportion have been rigorously  
14 evaluated.<sup>52</sup> Furthermore, as cyberbullying rarely induces negative impacts on child  
15 health independently, interventions to tackle these effects must also target traditional  
16 forms of bullying to have meaningful impact.  
17  
18  
19  
20  
21  
22  
23  
24  
25

26 Addressing the global public health problem of bullying in childhood and adolescence  
27 is vital for the achievement of the Sustainable Development Goals. In recognition of  
28 this, UNESCO recently launched its first International Day Against Violence and  
29 Bullying at School, an annual event which aims to build global awareness about the  
30 problem's scale, severity, and need for collaborative action.<sup>53</sup> Meaningful progress on  
31 this problem is urgently needed to increase mental wellbeing and reduce the burden  
32 of mental illness in both children and adults globally. Suggestions for immediate action  
33 are briefly described in Box 1.  
34  
35  
36  
37  
38  
39  
40  
41  
42  
43  
44  
45  
46

47 **Box 1. Actions needed to improve child health through the prevention of bullying**

- 48  
49  
50  
51  
52  
53  
54  
55  
56  
57  
58  
59  
60
- Promote the importance of parental and peer support in the prevention of bully victimisation across families and schools
  - Educate health professionals about the consequences of childhood bullying, and provide training and resources to allow identification, appropriate management and timely referral of such cases (see below)

- Develop and make widely available bullying prevention interventions that tackle sibling bullying in the home
- Create and deploy whole-school cooperative learning approaches to reduce bullying within educational institutions
- Address cyberbullying with evidence-based interventions that also tackle traditional forms of bullying
- Increase awareness of the impacts of bullying on child health amongst primary care professionals

### What to do if you suspect childhood bullying

GPs recognise their responsibility to deal with disclosures of childhood bullying and its associated health consequences, but feel unable to adequately do so due to the constraints of time-pressured primary care consultations, and uncertainty around the specialist services to which such children can be appropriately referred.<sup>54</sup>

Clear management and referral pathways for health professionals dealing with childhood bullying are lacking in both primary and secondary care. Local, national and online anti-bullying organisations, such as Ditch the Label<sup>55</sup> and the Anti-Bullying Alliance,<sup>56</sup> provide free advice for children affected by bullying, and their parents, teachers, and health professionals, along with free online certified CPD training for anyone working with children. School nurses continue to act as liaisons between primary care and education systems,<sup>57</sup> and should be central to the multi-disciplinary management of childhood bullying. Finally, if bullying is considered to be contributory to childhood depression, Child and Adolescent Mental Health Services, along with

1  
2  
3 primary care practitioners and educational professionals, should work collaboratively  
4  
5 to foster effective antibullying approaches.<sup>58</sup>  
6  
7  
8  
9

10  
11 <sup>1</sup> World Health Organization. Social determinants of health and well-being among  
12 young people. Health Behaviour in School-aged Children (HBSC) study: international  
13 report from the 2009/2010 survey. Health Policy for Children and Adolescents, No. 6.  
14 2012. [https://www.euro.who.int/\\_\\_data/assets/pdf\\_file/0003/163857/Social-](https://www.euro.who.int/__data/assets/pdf_file/0003/163857/Social-determinants-of-health-and-well-being-among-young-people.pdf)  
15 [determinants-of-health-and-well-being-among-young-people.pdf](https://www.euro.who.int/__data/assets/pdf_file/0003/163857/Social-determinants-of-health-and-well-being-among-young-people.pdf) [accessed 28  
16 November 2020]  
17  
18  
19  
20  
21

22  
23 <sup>2</sup> DS Hawker, MJ Boulton. Twenty years' research on peer victimization and  
24 psychosocial adjustment: a meta-analytic review of cross-sectional studies. *Journal*  
25 *of Child Psychology and Psychiatry* June 2000; 41(4): 441-455. DOI: 10.1111/1469-  
26 7610.00629  
27  
28  
29  
30

31  
32 <sup>3</sup> The Lancet Psychiatry. Why be happy when you could be normal? *The Lancet*  
33 *Psychiatry* 01 October 2015; 2(10): 851. DOI: 10.1016/S2215-0366(15)00420-4  
34  
35  
36

37  
38 <sup>4</sup> D Olweus. Bully/victim problems among school children: some basic facts and  
39 effects of a school-based intervention program. In: D Pepler, K Rubin K. *The*  
40 *development and treatment of childhood aggression*. Hillsdale, NJ, Erlbaum, 1991:  
41 411-448.  
42  
43  
44

45  
46 <sup>5</sup> WE Copeland, D Wolke, A Angold, et al. Adult psychiatric outcomes of bullying and  
47 being bullied by peers in childhood and adolescence. *JAMA Psychiatry* April 2013;  
48 70: 419–426. DOI: 10.1001/jamapsychiatry.2013.504  
49  
50  
51

52  
53 <sup>6</sup> UNESCO. TCG4: Development of SDG thematic indicator 4.a.2. January 2018.  
54 [http://tcg.uis.unesco.org/wp-content/uploads/sites/4/2018/08/TCG4-41-Development-](http://tcg.uis.unesco.org/wp-content/uploads/sites/4/2018/08/TCG4-41-Development-of-Indicator-4.a.2.pdf)  
55 [of-Indicator-4.a.2.pdf](http://tcg.uis.unesco.org/wp-content/uploads/sites/4/2018/08/TCG4-41-Development-of-Indicator-4.a.2.pdf) [accessed 28 November 2020]  
56  
57  
58  
59  
60

1  
2  
3  
4 7 UN News. Violence and bullying affect one in three students, education experts  
5 warn. 05 November 2020. <https://news.un.org/en/story/2020/11/1076932> [accessed  
6  
7  
8 29 November 2020]  
9

10  
11 8 D Wolke, N Tippet, S Dantchev. Bullying in the family: sibling bullying. *The Lancet*  
12  
13 *Psychiatry* 01 October 2015; 2(10): 917-929. DOI: 10.1016/S2215-0366(15)00262-X  
14

15  
16 9 I Rivers, PK Smith. Types of bullying behaviour and their correlates. *Aggressive*  
17  
18 *Behaviour* 1994; 20(5): 359-368. DOI: 10.1002/1098-2337(1994)20:5<359::AID-  
19  
20 AB2480200503>3.0.CO;2-J  
21

22  
23 10 LE McMaster, J Connolly, D Peplar, WM Craig. Peer to peer sexual harassment in  
24  
25 early adolescence: A developmental perspective. *Developmental Psychopathology*  
26  
27 2020; 14: 91-105. DOI: 10.1017/s0954579402001050  
28

29  
30 11 R Slonje, PH Smith. Cyberbullying: another main type of bullying? *Scandinavian*  
31  
32 *Journal of Psychology* April 2008; 49(2): 147-54. DOI: 10.1111/j.1467-  
33  
34 9450.2007.00611.x  
35

36  
37 12 Olweus D. *Bullying at school: What we know and what we can do*. Oxford, UK:  
38  
39 Blackwell; 1993.  
40

41  
42 13 S Haug, RP Castro, M Kwon, et al. Smartphone use and smartphone addiction  
43  
44 among young people in Switzerland. *Journal of Behavioral Addiction* 01 December  
45  
46 2015; 4(4): 299-307. DOI: 10.1556/2006.4.2015.037  
47

48  
49 14 H Clark, AM Coll-Seck, A Banerjee, et al. A future for the world's children? A  
50  
51 WHO–UNICEF–Lancet Commission. *The Lancet* 22 February 2020; 395(10224):  
52  
53 605-658. DOI: 10.1016/S0140-6736(19)32540-1  
54

55  
56 15 F Sticca, S Perren. Is Cyberbullying Worse than Traditional Bullying? Examining  
57  
58 the Differential Roles of Medium, Publicity, and Anonymity for the Perceived Severity  
59  
60

---

of Bullying. *Journal of Youth and Adolescence* 2013; 42: 739-750. DOI: 10.1007/s10964-012-9867-3

<sup>16</sup> World Health Organization. Global school-based student health survey (GSHS). <https://www.who.int/ncds/surveillance/gshs/en/> [accessed 29 November 2020]

<sup>17</sup> World Health Organization Regional Office for Europe. Health Behaviour in School-aged Children (HBSC). <https://www.euro.who.int/en/health-topics/Life-stages/child-and-adolescent-health/health-behaviour-in-school-aged-children-hbsc> [accessed 29 November 2020]

<sup>18</sup> UNESCO. Behind the numbers: Ending school violence and bullying. 2019. <https://unesdoc.unesco.org/ark:/48223/pf0000366483> [accessed 27 November 2020]

<sup>19</sup> International Association for the Evaluation of Educational Achievement. Progress in International Reading Literacy Study. <https://www.iea.nl/studies/iea/pirls> [accessed 29 November 2020]

<sup>20</sup> Organisation for Economic Co-operation and Development. Programme for International Student Assessment. <https://www.oecd.org/pisa/> [accessed 29 November 2020]

<sup>21</sup> A Harrison. Cyber-bullying: Horror in the home. *BBC News Online* 17 August 2013. <https://www.bbc.co.uk/news/education-23727673> [accessed 02 December 2020]

<sup>22</sup> P McGraw. It's time to stop the cyberbullying epidemic. *Huffington Post* 05 June 2015. [http://www.huffingtonpost.com/dr-phil/stop-cyberbullying\\_b\\_6647990.html](http://www.huffingtonpost.com/dr-phil/stop-cyberbullying_b_6647990.html) [accessed 02 December 2020]

<sup>23</sup> KL Modecki, J Minchin, AG Harbaugh, et al. Bullying Prevalence Across Contexts: A Meta-analysis Measuring Cyber and Traditional Bullying. *Journal of Adolescent Health* 01 November 2014; 55(5): 602-611. DOI: 10.1016/j.jadohealth.2014.06.007

1  
2  
3  
4  
5  
6 <sup>24</sup> AK Przybylski, L Bowes. Cyberbullying and adolescent well-being in England: a  
7 population-based cross-sectional study. *The Lancet Child & Adolescent Health* 01  
8 September 2017; 1(1): 19-26. DOI: [https://doi.org/10.1016/S2352-4642\(17\)30011-1](https://doi.org/10.1016/S2352-4642(17)30011-1)  
9

10  
11  
12  
13 <sup>25</sup> UNESCO. Third Regional Comparative and Explanatory Study on Education  
14 Quality (TERCE). 28 August 2015. [http://www.unesco.org/new/en/media-](http://www.unesco.org/new/en/media-services/single-view/news/third_regional_comparative_and_explanatory_study_on_educatio/)  
15 [services/single-](http://www.unesco.org/new/en/media-services/single-view/news/third_regional_comparative_and_explanatory_study_on_educatio/)  
16 [view/news/third\\_regional\\_comparative\\_and\\_explanatory\\_study\\_on\\_educatio/](http://www.unesco.org/new/en/media-services/single-view/news/third_regional_comparative_and_explanatory_study_on_educatio/)  
17 [accessed 30 November 2020]  
18  
19  
20  
21

22  
23 <sup>26</sup> G Gini, T Pozzoli. Association between bullying and psychosomatic problems: a  
24 meta-analysis. *Pediatrics* March 2009; 123(3): 1059-1065. DOI: 10.1542/peds.2008-  
25 1215  
26  
27

28  
29  
30 <sup>27</sup> SE Moore, RE Norman, S Suetani. Consequences of bullying victimization in  
31 childhood and adolescence: A systematic review and meta-analysis. *World Journal*  
32 *of Psychiatry* 22 March 2017; 7(1): 60-76. DOI: 10.5498%2Fwjv.v7.i1.60  
33  
34  
35

36  
37 <sup>28</sup> MK Holt, AM Vivolo-Kantor, JR Polanin, et al. Bullying and suicidal ideation and  
38 behaviors: a meta-analysis. *Pediatrics* February 2015; 135(2): e496-e509. DOI:  
39 10.1542/peds.2014-1864  
40  
41  
42

43  
44 <sup>29</sup> M van Geel, P Vedder, J Tanilon. Relationship Between Peer Victimization,  
45 Cyberbullying, and Suicide in Children and Adolescents: A Meta-analysis. *JAMA*  
46 *Pediatrics* May 2014; 168(5): 435-442. DOI: 10.1001/jamapediatrics.2013.4143  
47  
48  
49

50  
51 <sup>30</sup> HL Fisher, TE Moffitt, RM Houts, et al. Bullying victimisation and risk of self harm  
52 in early adolescence: longitudinal cohort study. *BMJ* 26 April 2012; 344: e2683. DOI:  
53 10.1136%2Fbmj.e2683  
54  
55  
56  
57  
58  
59  
60



1  
2  
3  
4  
5  
6  
7  
8  
9  
10  
11  
12  
13  
14  
15  
16  
17  
18  
19  
20  
21  
22  
23  
24  
25  
26  
27  
28  
29  
30  
31  
32  
33  
34  
35  
36  
37  
38  
39  
40  
41  
42  
43  
44  
45  
46  
47  
48  
49  
50  
51  
52  
53  
54  
55  
56  
57  
58  
59  
60

---

<sup>31</sup> G Catone, S Marwaha, E Kuipers, et al. Bullying victimisation and risk of psychotic phenomena: analyses of British national survey data. *The Lancet Psychiatry* 01 July 2015; 2(7): 618-624. DOI: 10.1016/S2215-0366(15)00055-3

<sup>32</sup> TR Nansel, M Overpeck, RS Pilla, et al. Bullying behaviors among US youth: prevalence and association with psychosocial adjustment. *JAMA* 25 April 2001; 285(16): 2094-2100. DOI:10.1001/jama.285.16.2094

<sup>33</sup> TR Nansel, M Overpeck, DL Haynie, et al. Relationships Between Bullying and Violence Among US Youth. *Archives of Pediatric and Adolescent Medicine* April 2003;157(4): 348-353. DOI:10.1001/archpedi.157.4.348

<sup>34</sup> Y Harel. A cross-national study of youth violence in Europe. *International Journal of Adolescent Medicine and Health* 01 July 1999, 11(3): 121-134. DOI: 10.1515/IJAMH.1999.11.3-4.121

<sup>35</sup> JJ Tang, Y Yu, HC Wilcox, et al. Global risks of suicidal behaviours and being bullied and their association in adolescents: School-based health survey in 83 countries. *EClinicalMedicine* 01 February 2020; 19: 100253. DOI: 10.1016/j.eclinm.2019.100253.

<sup>36</sup> R Takizawa, B Maughan, L Arseneault. Adult health outcomes of childhood bullying victimization: evidence from a five-decade longitudinal British birth cohort. *American Journal of Psychiatry* July 2014; 171(7): 777-84. DOI: 10.1176/appi.ajp.2014.13101401

<sup>37</sup> J Juvonen, S Graham, MA Schuster. Bullying among young adolescents: the strong, the weak, and the troubled. *Pediatrics* December 2003; 112(6): 1231-7. DOI: 10.1542/peds.112.6.1231. PMID: 14654590.

<sup>38</sup> RM Kowalski, SP Limber. Psychological, physical, and academic correlates of cyberbullying and traditional bullying. *Journal of Adolescent Health* July 2013;53(1 Suppl): S13-20. DOI: 10.1016/j.jadohealth.2012.09.018

1  
2  
3  
4  
5  
6  
7  
8  
9  
10  
11  
12  
13  
14  
15  
16  
17  
18  
19  
20  
21  
22  
23  
24  
25  
26  
27  
28  
29  
30  
31  
32  
33  
34  
35  
36  
37  
38  
39  
40  
41  
42  
43  
44  
45  
46  
47  
48  
49  
50  
51  
52  
53  
54  
55  
56  
57  
58  
59  
60

---

<sup>39</sup> D Wolke, K Lee, A Guy. Cyberbullying: a storm in a teacup? *European Journal of Child & Adolescent Psychiatry* February 2017; 26: 899–908. DOI: 10.1007/s00787-017-0954-6

<sup>40</sup> D Wolke. Cyberbullying: how big a deal is it? *The Lancet Child & Adolescent Health* 01 September 2017; 1(1): 2-3. DOI: 10.1016/S2352-4642(17)30020-2

<sup>41</sup> R Bannink, S Broeren, PM van de Looij-Jansen, et al. Cyber and Traditional Bullying Victimization as a Risk Factor for Mental Health Problems and Suicidal Ideation in Adolescents. *PLOS ONE* 09 April 2014. DOI: 10.1371/journal.pone.0094026

<sup>42</sup> AB Klomek, A Sourander, H Elonheimo. Bullying by peers in childhood and effects on psychopathology, suicidality, and criminality in adulthood. *The Lancet Psychiatry* 01 October 2015; 2(10):930-941. DOI: 10.1016/S2215-0366(15)00223-0

<sup>43</sup> JF Sigurdson, AM Undheim, JL Wallander, et al. The long-term effects of being bullied or a bully in adolescence on externalizing and internalizing mental health problems in adulthood. *Child and Adolescent Psychiatry and Mental Health* 23 August 2015; 9: 42. DOI: 10.1186/s13034-015-0075-2

<sup>44</sup> L Bowes, C Joinson, D Wolke, L Glyn. Peer victimisation during adolescence and its impact on depression in early adulthood: prospective cohort study in the United Kingdom. *BMJ* June 2015; 350: h2469. DOI: 10.1136/bmj.h2469

<sup>45</sup> ST Lereya, WE Copeland, EJ Costello, et al. Adult mental health consequences of peer bullying and maltreatment in childhood: two cohorts in two countries. *The Lancet Psychiatry* 01 June 2015; 2(6): 524-531. DOI: 10.1016/S2215-0366(15)00165-0

<sup>46</sup> T Biswas, JG Scott, K Munir, et al. Global variation in the prevalence of bullying victimisation amongst adolescents: Role of peer and parental supports.

---

*EClinicalMedicine* 01 March 2020; 20: 100276. DOI: 10.1016/j.eclinm.2020.100276

47 RC Vreeman, AE Carroll. A Systematic Review of School-Based Interventions to Prevent Bullying. *Archives of Pediatric and Adolescent Medicine* January 2007; 161(1): 78–88. DOI:10.1001/archpedi.161.1.78

48 D Olweus, SP Limber. Bullying in school: Evaluation and dissemination of the Olweus Bullying Prevention Program. *American Journal of Orthopsychiatry* 2010; 80(1): 124-134. DOI: 10.1111/j.1939-0025.2010.01015.x

49 CJ Ferguson, CS Miguel, JC Kilburn, et al. The effectiveness of school-based anti-bullying programs: A meta-analytic review. *Criminal Justice Review* 2007; 32(4): 401-414. DOI: 10.1177/0734016807311712

50 KW Merrell, BA Gueldner, SW Ross, et al. How effective are school bullying intervention programs? A meta-analysis of intervention research. *School Psychology Quarterly* 2008; 23:26-42. DOI: 10.1037/1045-3830.23.1.26

51 MJ Van Ryzin, CJ Roseth. Cooperative Learning in Middle School: A Means to Improve Peer Relations and Reduce Victimization, Bullying, and Related Outcomes. *Journal of Educational Psychology* 11 November 2018; 110(8): 1192-1201. DOI:10.1037/edu0000265

52 DV Cioppa, A O'Neil, W Craig. Learning from traditional bullying interventions: A review of research on cyberbullying and best practice. *Aggression and Violent Behavior* July 2015; 23: 61-68. DOI: 10.1016/j.avb.2015.05.009

53 UNESCO. International day against violence and bullying at school including cyberbullying. 04 November 2020.

54 L Condon, V Prasad. GP views on their role in bullying disclosure by children and young people in the community: a cross-sectional qualitative study in English primary care. *British Journal of General Practice* November 2019; 69(688): e752-e759. DOI: 10.3399/bjgp19X706013

1  
2  
3  
4  
5  
6 <sup>55</sup> Ditch the Label. <https://www.ditchthelabel.org> [accessed 03 December 2020]  
7  
8

9  
10 <sup>56</sup> Anti-Bullying Alliance. <https://www.anti-bullyingalliance.org.uk/> [accessed 03  
11 December 2020]  
12

13  
14 <sup>57</sup> Royal College of Nursing. The Best Start: The Future of Children's Health – One  
15 Year on. Valuing school nurses and health visitors in England. 14 May 2018.  
16 <https://www.rcn.org.uk/professional-development/publications/pdf-007000> [accessed  
17 03 December 2020]  
18  
19  
20  
21

22  
23 <sup>58</sup> National Institute for Health and Care Excellence. Depression in children and  
24 young people: identification and management. NICE guideline [NG134]. 25 June  
25 2019. [https://www.nice.org.uk/guidance/ng134/chapter/Recommendations#step-3-  
26 managing-mild-depression](https://www.nice.org.uk/guidance/ng134/chapter/Recommendations#step-3-managing-mild-depression) [accessed 03 December 2020]  
27  
28  
29  
30  
31  
32  
33  
34  
35  
36  
37  
38  
39  
40  
41  
42  
43  
44  
45  
46  
47  
48  
49  
50  
51  
52  
53  
54  
55  
56  
57  
58  
59  
60

# BMJ Paediatrics Open

## Bullying in children: impact on child health

|                               |                                                                                                                  |
|-------------------------------|------------------------------------------------------------------------------------------------------------------|
| Journal:                      | <i>BMJ Paediatrics Open</i>                                                                                      |
| Manuscript ID                 | bmjpo-2020-000939.R1                                                                                             |
| Article Type:                 | Review                                                                                                           |
| Date Submitted by the Author: | 24-Feb-2021                                                                                                      |
| Complete List of Authors:     | Armitage, Richard ; Division of Epidemiology and Public Health, University of Nottingham, Nottingham NG7 2RD, UK |
| Keywords:                     | Adolescent Health, Child Psychiatry, Psychology                                                                  |
|                               |                                                                                                                  |

SCHOLARONE™  
Manuscripts

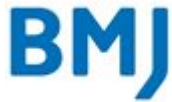

I, the Submitting Author has the right to grant and does grant on behalf of all authors of the Work (as defined in the below author licence), an exclusive licence and/or a non-exclusive licence for contributions from authors who are: i) UK Crown employees; ii) where BMJ has agreed a CC-BY licence shall apply, and/or iii) in accordance with the terms applicable for US Federal Government officers or employees acting as part of their official duties; on a worldwide, perpetual, irrevocable, royalty-free basis to BMJ Publishing Group Ltd ("BMJ") its licensees and where the relevant Journal is co-owned by BMJ to the co-owners of the Journal, to publish the Work in this journal and any other BMJ products and to exploit all rights, as set out in our [licence](#).

The Submitting Author accepts and understands that any supply made under these terms is made by BMJ to the Submitting Author unless you are acting as an employee on behalf of your employer or a postgraduate student of an affiliated institution which is paying any applicable article publishing charge ("APC") for Open Access articles. Where the Submitting Author wishes to make the Work available on an Open Access basis (and intends to pay the relevant APC), the terms of reuse of such Open Access shall be governed by a Creative Commons licence – details of these licences and which [Creative Commons](#) licence will apply to this Work are set out in our licence referred to above.

Other than as permitted in any relevant BMJ Author's Self Archiving Policies, I confirm this Work has not been accepted for publication elsewhere, is not being considered for publication elsewhere and does not duplicate material already published. I confirm all authors consent to publication of this Work and authorise the granting of this licence.

**Title**

Bullying in children: impact on child health

**Corresponding author**

Dr Richard Armitage

Division of Epidemiology & Public Health, University of Nottingham, Nottingham City

Hospital, Hucknall Road, Nottingham, NG5 1PB, UK

Richard.Armitage4@nottingham.ac.uk

+44(0)7765065860

**Keywords**

Bullying

Cyber Bullying

Children's Health

**Word count**

2506

**Reference count**

58

## Abstract

Bullying in childhood is a major public health problem that increases the risk of poor health, social, and educational outcomes in childhood and adolescence. These consequences are felt by all those involved in bullying (bullies, victims, and bully-victims), and are now recognised to propagate deep into adulthood. Cyberbullying is a relatively new type of bullying in addition to the traditional forms of direct physical, direct verbal, and indirect bullying. Children who are perceived as being 'different' in any way are at greater risk of victimisation, with physical appearance being the most frequent trigger of childhood bullying. Globally, one in three children have been bullied in the past 30 days, although there is substantial regional variation in the prevalence and type of bullying experienced. The consequences of childhood bullying can be categorised into three broad categories: educational consequences during childhood, health consequences during childhood, and all consequences during adulthood. Many dose-response relationships exist between the frequency and intensity of bullying experienced and the severity of negative health consequence reported. The majority of victims of cyberbullying are also victims of traditional bullying, meaning cyberbullying creates very few additional victims. Overall, adverse mental health outcomes due to bullying in childhood most severely impact on bully-victims. Bullying prevention is vital for the achievement of the Sustainable Development Goals, with whole-school cooperative learning interventions having the strongest evidence base for successful outcomes. Clear management and referral pathways for health professionals dealing with childhood bullying are lacking in both primary and secondary care, although specialist services are available locally and online.



## Key messages

- Bullying in childhood is a global public health problem that impacts on child, adolescent and adult health
- Bullying exists in its traditional, sexual, and cyber forms, all of which impact on the physical, mental and social health of victims, bullies, and bully-victims
- Children perceived as 'different' in any way are at greater risk of victimisation
- Bullying is extremely prevalent: one in three children globally has been victimised in the preceding month
- Existing bullying prevention interventions are rarely evidence-based and alternative approaches are urgently needed

## Introduction

Bullying in childhood has been classified by the World Health Organization (WHO) as a major public health problem,<sup>1</sup> and for decades has been known to increase the risk of poor health, social, and educational outcomes in childhood and adolescence.<sup>2</sup> Characterised by repeated victimisation within a power-imbalanced relationship, bullying encompasses a wide range of types, frequencies, and aggression levels, ranging from teasing and name-calling to physical, verbal, and social abuse.<sup>3</sup> The dynamics within such relationships become consolidated with repeated and sustained episodes of bullying: bullies accrue compounding power while victims are stripped of their own and become progressively less able to defend themselves and increasingly vulnerable to psychological distress.<sup>4</sup>

1  
2  
3 However, only in the last decade have prospective studies been published that reveal  
4 the far-reaching effects of childhood bullying that extend into adulthood. There is now  
5 substantial evidence that being bullied as a child or adolescent has a causal  
6 relationship to the development of mental health issues beyond the early years of life,  
7 including depression, anxiety, and suicidality.<sup>5</sup> As such, addressing the global public  
8 health problem of bullying in childhood has received increasing international attention  
9 and is vital for the achievement of Sustainable Development Goal 4.<sup>6</sup> The impact of  
10 the COVID-19 pandemic on child health and education has focussed further attention  
11 on bullying in its digital form, so-called 'cyberbullying,' the prevalence of which is  
12 feared to be increasing.<sup>7</sup>  
13  
14  
15  
16  
17  
18  
19  
20  
21  
22  
23  
24  
25  
26  
27  
28

### 29 Types of bullying

30  
31  
32  
33

34 Participants in childhood bullying take up one of three roles: the victim, the bully (or  
35 perpetrator), or the bully-victim (who is both a perpetrator and a victim of bullying).<sup>5</sup>  
36 Victims and bullies either belong to the same peer group (peer bullying), or the same  
37 family unit (sibling bullying),<sup>8</sup> although bullying frequently occurs in multiple settings  
38 simultaneously, such as at school (peer bullying) and in the home (sibling bullying),  
39 representing a ubiquitous ecology of bullying that permeates the child's life.  
40  
41  
42  
43  
44  
45  
46  
47  
48  
49

50 Three main types of bullying are observed, the typical characteristics of which are  
51 illustrated in Table 1.  
52  
53  
54  
55  
56

57 **Table 1. Typical characteristics of the main types of childhood bullying**  
58  
59  
60

| <u>Types</u>         | <u>Typical characteristics</u>                                                                                                                  | <u>Examples</u>                                                                                                                                                             | <u>Reference</u> |
|----------------------|-------------------------------------------------------------------------------------------------------------------------------------------------|-----------------------------------------------------------------------------------------------------------------------------------------------------------------------------|------------------|
| Traditional bullying | Direct physical (overt physical aggression or assaults)                                                                                         | Pushing, punching and kicking                                                                                                                                               | 9                |
|                      | Direct verbal (overt verbal attacks that are highly personal)                                                                                   | Teasing, taunting, or threatening behaviour directed at the victim's appearance, abilities, family, culture, race or religion                                               |                  |
|                      | Indirect and emotional (covert behaviour that damages peer relationships, self-esteem or social status)                                         | Passing nasty notes, offensive graffiti, defacing or damaging personal property, exclusion, ostracism and shaming                                                           |                  |
| Sexual bullying      | Sexually bothering another person (may also be referred to as 'sexual harassment')                                                              | Inappropriate and unwanted touching, using sexualised language, and pressurising another to act promiscuously                                                               | 10               |
| Cyberbullying        | Aggressive behaviour or emotional manipulation delivered through digital technology, specifically mobile phones, the internet, and social media | Spreading false stories about a victim online, posting digital media featuring a victim online without permission, excluding a victim from participation in an online space | 11               |

While traditional bullying has been recognised and studied for many decades,<sup>12</sup> and is often accepted as an inevitable aspect of a normal childhood,<sup>3</sup> cyberbullying represents a relatively new phenomenon in which childhood bullying now takes place through digital modalities. The widespread uptake of electronic devices has reached almost complete saturation amongst adolescents in high-income countries, with users checking their devices hundreds of times and for hours each day.<sup>13</sup> While providing

beneficial access to information and social support, this large and growing online exposure of young people renders them vulnerable to exploitation, gambling, and grooming by criminals and sexual abusers, as well as cyberbullying.<sup>14</sup> Due to the increased potential for large audiences, anonymous attacks, and the permanence of posted messages, coupled with lower levels of direct feedback, reduced time and space limits, and decreased adult supervision, it is feared that cyberbullying may pose a greater threat to child and adolescent health than traditional bullying modalities.<sup>15</sup>

### Factors that influence bullying

Two large-scale international surveys regularly conducted by the WHO – the Global School-based Student Health Survey (GSHS)<sup>16</sup> and the Health Behaviour in School-aged Children (HBSC) study<sup>17</sup> – provide data from 144 countries and territories in all regions of the world. These data identify specific factors that strongly influence the type, frequency, and severity of bullying experienced by children and adolescents globally. These factors, which are briefly described in Table 2, suggest that children who are perceived as being ‘different’ in any way are at greater risk of victimisation.

**Table 2. Summary of factors that influence child and adolescent bullying<sup>18</sup>**

| <u>Influencing factor</u> | <u>Description</u>                                                                                                                                     |
|---------------------------|--------------------------------------------------------------------------------------------------------------------------------------------------------|
| Sex differences           | Globally, girls and boys are equally likely to experience bullying.                                                                                    |
|                           | Boys are more likely to experience direct physical bullying; girls are more likely to experience direct verbal and indirect bullying.                  |
|                           | Boys are more likely to be perpetrators of direct physical bullying while girls are more likely to be perpetrators of indirect and emotional bullying. |

|                                  |                                                                                                                                                                                   |
|----------------------------------|-----------------------------------------------------------------------------------------------------------------------------------------------------------------------------------|
|                                  | Girls are more likely than boys to experience bullying based on physical appearance.                                                                                              |
|                                  | Globally, there are no major differences in the extent to which girls and boys experience sexual bullying, but there are regional differences.                                    |
|                                  | Girls are more likely than boys to be cyberbullied via digital messages, but there is less discrepancy between the sexes in the prevalence of cyberbullying via digital pictures. |
| Age differences                  | As children grow older, they are less likely to experience bullying by peers.                                                                                                     |
|                                  | Age differences are less pronounced for bullying perpetration.                                                                                                                    |
|                                  | Older children may be more exposed to cyberbullying.                                                                                                                              |
| Not conforming to gender norms   | Children viewed as gender non-conforming are at higher risk of bullying.                                                                                                          |
| Physical appearance              | Physical appearance is the most frequent reason for bullying.                                                                                                                     |
|                                  | Body dissatisfaction and being overweight are associated with bullying.                                                                                                           |
| Physical and learning disability | Physical and learning disability is associated with increased risk of being bullied.                                                                                              |
| Race, nationality or colour      | Bullying based on race, nationality or colour is the second most frequent reason for bullying reported by children.                                                               |
| Religion                         | Compared to other factors, religion is mentioned by far fewer children as a reason for being bullied.                                                                             |
| Socio-economic status            | Socio-economic disadvantage is associated with increased risk of being bullied.                                                                                                   |
|                                  | A similar relationship is seen between self-perceived social status and cyberbullying.                                                                                            |
| Migration status                 | Immigrant children are more likely to be bullied than their native-born peers.                                                                                                    |
| School environment               | A positive school environment reduces bullying.                                                                                                                                   |
| Educational attainment           | Overall, educational attainment is a protective factor against being bullied.                                                                                                     |

|                         |                                                                         |
|-------------------------|-------------------------------------------------------------------------|
| Peer and family support | Family support and communication can be an important protective factor. |
|-------------------------|-------------------------------------------------------------------------|

## Prevalence of bullying

A 2019 report from the United Nations Educational, Scientific and Cultural Organization (UNESCO),<sup>18</sup> examined the global prevalence of bullying in childhood and adolescence using data from the GSHS and HBSC studies along with additional data from the Progress in International Reading Literacy Study (PIRLS)<sup>19</sup> and Programme for International Students Assessment (PISA).<sup>20</sup> It found that almost one in three (32%) children globally has been the victim of bullying on one or more days in the preceding month, and that one in 13 (7.3%) has been bullied on six or more days over the same period.<sup>18</sup> However, there is substantial regional variation in the prevalence of bullying across the world, ranging from 22.8% of children being victimised in Central America, through 25.0% and 31.7% in Europe and North America respectively, to 48.2% in Sub-Saharan Africa. There is also significant geographical variation in the type of bullying reported, with direct physical and sexual bullying being dominant in low- and middle-income countries, and indirect bullying being the most frequent type in high-income regions. Nevertheless, bullying is a sizeable public health problem of truly global importance.

Encouragingly, there has been a decrease in the prevalence of bullying in half (50.0%) of countries since 2002, while 31.4% have seen no significant change over this timeframe.<sup>18</sup> However, 18.6% of countries have witnessed an increase in childhood bullying, primarily amongst members of one sex or the other, although in both girls

1  
2  
3 and boys in North Africa, Sub-Saharan Africa, Myanmar, the Philippines, and United  
4  
5 Arab Emirates.<sup>18</sup>  
6  
7  
8  
9

10 Since its appearance, cyberbullying has received substantial media attention claiming  
11 that the near-ubiquitous uptake of social media amongst adolescents has induced a  
12 tidal wave of online victimisation and triggered multiple high-profile suicides amongst  
13 adolescents after being bullied online.<sup>21,22</sup> However, a recent meta-analysis suggests  
14 that cyberbullying is far less prevalent than bullying in its traditional forms, with rates  
15 of online victimisation less than half of those offline.<sup>23</sup> The study also found relatively  
16 strong correlations between bullying in its traditional and cyber varieties, suggesting  
17 victims of online bullying are also likely to be bullied offline, and that that these different  
18 forms of victimisation reflect alternative methods of enacting the same perpetrator  
19 behaviour. Recent evidence from England also indicates difference between sexes,  
20 with one in 20 adolescent girls and one in 50 adolescent boys reporting cyberbully  
21 victimisation over the previous two months.<sup>24</sup>  
22  
23  
24  
25  
26  
27  
28  
29  
30  
31  
32  
33  
34  
35  
36  
37  
38  
39

### 40 Consequences of bullying

41  
42  
43  
44

45 There is a vast range of possible consequences of bullying in childhood, determined  
46 by multiple factors including the frequency, severity, and type of bullying, the role of  
47 the participant (victim, bully, or bully-victim), and the timing at which the consequences  
48 are observed (during childhood, adolescence, or adulthood). The consequences can  
49 be categorised into three broad categories: educational consequences during  
50 childhood and adolescence, health consequences during childhood and adolescence,  
51 and all consequences during adulthood. Each will now be discussed individually.  
52  
53  
54  
55  
56  
57  
58  
59  
60

### Educational consequences during childhood and adolescence

Children who are frequently bullied are more likely to feel like an outsider at school,<sup>20</sup> while indirect bullying specifically has been shown to have a negative effect on socialisation and feelings of acceptance amongst children in schools.<sup>25</sup> Accordingly, a child's sense of belonging at school increases as bullying decreases.<sup>19</sup> In addition, being bullied can affect continued engagement in education. Compared with those who are not bullied, children who are frequently bullied are nearly twice as likely to regularly skip school, and are more likely to want to leave school after finishing secondary education.<sup>20</sup> The effect of frequent bullying on these educational consequences is illustrated in Table 3.

**Table 3. Relationship between being frequently bullied and educational consequences<sup>20</sup>**

| <u>Consequence</u>                                         | <u>Not frequently</u> | <u>Frequently</u> |
|------------------------------------------------------------|-----------------------|-------------------|
|                                                            | <u>bullied</u>        | <u>bullied</u>    |
| Feeling like an outsider (or left out of things at school) | 14.9%                 | 42.4%             |
| Feeling anxious for a test even if well prepared           | 54.6%                 | 63.9%             |
| Skipped school at least 3-4 days in previous two weeks     | 4.1%                  | 9.2%              |
| Expected to end education at the secondary level           | 34.8%                 | 44.5%             |

Children who are bullied score lower in tests than those who are not. For example, in 15 Latin American countries, the test scores of bullied children were 2.1% lower in mathematics and 2.5% lower in reading than non-bullied children.<sup>25</sup> Compared with children never or almost never bullied, average learning achievement scores were 2.7% lower in children bullied monthly, and 7.5% lower in children bullied weekly,



1  
2  
3 indicating a dose-response relationship. These findings are globally consistent across  
4  
5 both low- and high-income countries.<sup>20</sup>  
6  
7  
8  
9

### 10 **Health consequences during childhood and adolescence**

11  
12 Numerous meta-analyses,<sup>2,26,27,28,29</sup> longitudinal studies,<sup>5,30,31</sup> and cross-sectional  
13  
14 studies<sup>32,33,34</sup> have demonstrated strong relationships between childhood bullying and  
15  
16 physical, mental, and social health outcomes in victims, bullies, and bully-victims.  
17  
18 Some of these consequences are illustrated in Table 4. Reported physical health  
19  
20 outcomes are mostly psychosomatic in nature. Most studies focused on the impacts  
21  
22 on victims, although adverse effects on bullies and bully-victims are also recognised.  
23  
24 Many studies identified a dose-response relationship between the frequency and  
25  
26 intensity of bullying experienced and the severity of negative health consequence  
27  
28 reported.  
29  
30  
31  
32  
33  
34  
35  
36

37 **Table 4. Summary of childhood health consequences of bullying during childhood**

|                                    | <u>Experienced by</u> |              |                          | <u>Reference</u> |
|------------------------------------|-----------------------|--------------|--------------------------|------------------|
|                                    | <u>Victim</u>         | <u>Bully</u> | <u>Bully-<br/>victim</u> |                  |
| <b>Physical health outcomes</b>    |                       |              |                          |                  |
| Unspecified psychosomatic symptoms | x                     |              |                          | 27               |
| Feeling tired                      | x                     |              |                          | 27               |
| Poor appetite                      | x                     |              |                          | 27               |
| Stomach ache                       | x                     |              |                          | 27               |
| Sleeping difficulties              | x                     |              |                          | 27               |
| Headache                           | x                     |              |                          | 27               |

|                               |   |   |   |            |
|-------------------------------|---|---|---|------------|
| Back pain                     | x |   |   | 27         |
| Dizziness                     | x |   |   | 27         |
| <b>Mental health outcomes</b> |   |   |   |            |
| Depression                    | x |   | x | 2,5        |
| Anxiety                       | x |   | x | 2,5,26     |
| Psychotic symptoms            | x |   |   | 27,31      |
| Self-harm                     | x |   |   | 30         |
| Suicidal ideation             | x | x | x | 5,27,28,29 |
| Suicidal behaviour            | x | x | x | 27,28,29   |
| Illicit substance misuse      | x |   |   | 26,27      |
| Alcohol misuse                | x | x |   | 26,27,32   |
| Smoking                       | x | x | x | 32         |
| Panic disorder                | x |   | x | 5,27       |
| Loneliness                    | x |   | x | 2,32       |
| Low self-esteem               | x |   |   | 2          |
| Hyperactivity                 |   |   | x | 26         |
| Disturbed personality         |   | x | x | 5,26       |
| <b>Social health outcomes</b> |   |   |   |            |
| Isolation                     |   |   | x | 26         |
| Poor school adjustment        |   | x |   | 26         |
| Poor social adjustment        |   |   | x | 26         |
| Externalising problems        |   | x |   | 26         |
| Risky sexual behaviour        | x |   |   | 27         |
| Weapon carrying               | x | x |   | 33         |
| Disconnectedness with parents | x |   |   | 34         |

1  
2  
3  
4  
5  
6 While there is significant regional variation, the association between childhood bullying  
7 and suicidal ideation and behaviour are recognised globally.<sup>35</sup> Alarming, childhood  
8 bully victimisation is associated with a risk of mental health problems similar to that  
9 experienced by children in public or substitute care.<sup>36</sup> Victimisation in sibling bullying  
10 is associated with substantial emotional problems in childhood including low self-  
11 esteem, depression and self-harm,<sup>8</sup> and increases the risk of further victimisation  
12 through peer bullying. Overall, adverse mental health outcomes due to bullying in  
13 childhood appear to most severely impact on bully-victims, followed by victims and  
14 bullies.<sup>5,37</sup>

15  
16  
17  
18  
19  
20  
21  
22  
23  
24  
25  
26  
27  
28 9 out of 10 adolescents who report victimisation by cyberbullying are also victims of  
29 bullying in its traditional forms,<sup>38</sup> meaning cyberbullying creates very few additional  
30 victims,<sup>39</sup> but is another weapon in the bully's arsenal and has not replaced traditional  
31 methods.<sup>40</sup> Cyberbullying victimisation appears to be an independent risk factors for  
32 mental health problems only in girls, and is not associated with suicidal ideation in  
33 either sex.<sup>41</sup> As such, traditional bullying is still the major type of bullying associated  
34 with poor mental health outcomes in children and adolescents.<sup>24</sup>

### 35 36 37 38 39 40 41 42 43 44 45 46 47 **Consequences during adulthood**

48  
49 A recent meta-analysis<sup>42</sup> and numerous other prospective longitudinal studies<sup>5,36,43,44</sup>  
50 that used large, population-based, community samples analysed through quantitative  
51 methods suggest that childhood bullying can lead to three main negative outcomes in  
52 adulthood for victims, bullies, and bully-victims: psychopathology, suicidality, and  
53 criminality. Some of these consequences are illustrated in Table 5.

**Table 5. Summary of adulthood consequences of bullying during childhood**

|                        | Experienced by |       |                  | Reference  |
|------------------------|----------------|-------|------------------|------------|
|                        | Victim         | Bully | Bully-<br>victim |            |
| <b>Psychopathology</b> |                |       |                  |            |
| Depression             | x              | x     | x                | 5,36,43,44 |
| Anxiety                | x              | x     | x                | 5, 36,43   |
| Panic disorder         | x              | x     | x                | 5,43       |
| Disturbed personality  |                | x     |                  | 5          |
| <b>Suicidality</b>     | x              | x     | x                | 5,36,43    |
| <b>Criminality</b>     |                |       |                  | 42         |
| Violent crime          |                | x     | x                | 42         |
| Illicit drug misuse    |                | x     | x                | 42         |

A strong dose-response relationship exists between frequency of peer victimisation in childhood and adolescence and the risk of adulthood adversities.<sup>42</sup> For example, frequently bullied adolescents are twice as likely to develop depression in early adulthood compared with non-victimised peers, and is seen in both males and females.<sup>44</sup> Startlingly, the effects of this dose-response relationship seems to persist until at least 50 years of age.<sup>36</sup>

The impact of childhood bully victimisation on adulthood mental health outcomes is staggering. Approximately 29% of the adulthood depression burden could be attributed to victimisation by peers in adolescence,<sup>44</sup> and bully victimisation by peers is thought to have a greater impact on adult mental health than maltreatment by adults,

1  
2  
3 including sexual and physical abuse.<sup>45</sup> Finally, these consequences reach beyond the  
4 realm of health, as childhood bullying victimisation is associated with a lack of social  
5 relationships, economic hardship, and poor perceived quality of life at age 50.<sup>36</sup>  
6  
7  
8  
9

## 10 11 12 Bullying prevention 13

14  
15  
16  
17 Until not long ago, being bullied was considered a normal rite of passage through  
18 which children must simply persevere.<sup>3</sup> However, the size and scale of its impact on  
19 child health, and later on adulthood health, is now clearly understood and renders it a  
20 significant public health problem warranting urgent attention.<sup>1</sup> While parental and peer  
21 support are known to be protective against victimisation, regardless of global location,  
22 cultural norms or socioeconomic status,<sup>46</sup> structured programmes have been  
23 deployed at scale to prevent victimisation and its associated problems.  
24  
25  
26  
27  
28  
29  
30  
31  
32

33  
34  
35 School-based interventions have been shown to significantly reduce bullying  
36 behaviour in children and adolescents. Whole-school approaches incorporating  
37 multiple disciplines and high levels of staff engagement provide the greatest potential  
38 for successful outcomes, while curriculum-based and targeted social skills training are  
39 less effective methods that may even worsen victimisation.<sup>47</sup> The most widely  
40 adopted approach is the Olweus Bullying Prevention Program (OBPP), a  
41 comprehensive, school-wide programme designed to reduce bullying and achieve  
42 better peer relations among school-aged children.<sup>12</sup> However, despite its broad global  
43 uptake, meta-analyses of studies examining the effectiveness of the OBPP have  
44 shown mixed results across different cultures.<sup>48,49,50</sup>  
45  
46  
47  
48  
49  
50  
51  
52  
53  
54  
55  
56  
57  
58  
59  
60

1  
2  
3 Cooperative learning, in which teachers increase opportunities for positive peer  
4 interaction through carefully structured, group-based learning activities in schools, is  
5 an alternative approach to bullying prevention that has recently gained traction and  
6 been shown to significantly reduced bullying and its associated emotional problems  
7 while enhancing student engagement and educational achievement.<sup>51</sup> Also housed  
8 within the educational environment, School-Based Health Centres became popular in  
9 the United States in the 1990s and provide medical, mental health, behavioural,  
10 dental, and vision care for children directly in schools, and have had some positive  
11 impacts on mitigating the prevalence and impact of bullying.<sup>52</sup> In the UK, school  
12 nurses act as liaisons between primary care and education systems, and are often the  
13 first to identify victims of bullying turns, although their numbers in the UK fell by 30%  
14 between 2010 and 2019.<sup>53</sup>

15  
16  
17 Due to the link between sibling and peer bullying, there have been calls for bullying  
18 prevention interventions to be developed and made available to start in the home, and  
19 for general practitioners and paediatricians to routinely enquire about sibling bullying.<sup>8</sup>

20  
21  
22 While countless cyberbullying prevention programmes, both off- and online, are  
23 marketed to educational institutions, only a small proportion have been rigorously  
24 evaluated.<sup>54</sup> Furthermore, as cyberbullying rarely induces negative impacts on child  
25 health independently, interventions to tackle these effects must also target traditional  
26 forms of bullying to have meaningful impact.

27  
28  
29 Addressing the global public health problem of bullying in childhood and adolescence  
30 is vital for the achievement of the Sustainable Development Goals. In recognition of

1  
2  
3 this, UNESCO recently launched its first International Day Against Violence and  
4  
5 Bullying at School, an annual event which aims to build global awareness about the  
6  
7 problem's scale, severity, and need for collaborative action.<sup>55</sup> Meaningful progress on  
8  
9 this problem is urgently needed to increase mental wellbeing and reduce the burden  
10  
11 of mental illness in both children and adults globally. Suggestions for immediate action  
12  
13 are briefly described in Box 1.  
14  
15  
16  
17  
18

19 **Box 1. Actions needed to improve child health through the prevention of bullying**

- 20  
21
- 22 • Promote the importance of parental and peer support in the prevention of bully victimisation  
23 across families and schools
  - 24 • Educate health professionals about the consequences of childhood bullying, and provide  
25 training and resources to allow identification, appropriate management and timely referral of  
26 such cases (see below)
  - 27 • Develop and make widely available bullying prevention interventions that tackle sibling bullying  
28 in the home
  - 29 • Create and deploy whole-school cooperative learning approaches to reduce bullying within  
30 educational institutions
  - 31 • Address cyberbullying with evidence-based interventions that also tackle traditional forms of  
32 bullying
  - 33 • Increase awareness of the presentation and impacts of bullying on child health amongst primary  
34 care professionals
- 35  
36  
37  
38  
39  
40  
41  
42  
43  
44  
45  
46  
47  
48

49 What to do if you suspect childhood bullying

50  
51  
52  
53 GPs should be prepared to consider bullying as a potential contributory factor in  
54 presentations of non-specific physical and mental health complaints from children.  
55  
56 While GPs recognise their responsibility to deal with disclosures of childhood bullying  
57  
58  
59  
60

1  
2  
3 and its associated health consequences, they often feel unable to adequately do so  
4  
5 due to the constraints of time-pressured primary care consultations, and uncertainty  
6  
7 around the specialist services to which such children can be appropriately referred.<sup>56</sup>  
8  
9

10  
11  
12 Clear management and referral pathways for health professionals dealing with  
13  
14 childhood bullying are lacking in both primary and secondary care. Local, national and  
15  
16 online anti-bullying organisations, such as Ditch the Label<sup>57</sup> and the Anti-Bullying  
17  
18 Alliance,<sup>58</sup> provide free advice for children affected by bullying, and their parents,  
19  
20 teachers, and health professionals, along with free online certified CPD training for  
21  
22 anyone working with children. School nurses continue to act as liaisons between  
23  
24 primary care and education systems,<sup>59</sup> and should be central to the multi-disciplinary  
25  
26 management of childhood bullying. Finally, if bullying is considered to be contributory  
27  
28 to childhood depression, Child and Adolescent Mental Health Services, along with  
29  
30 primary care practitioners and educational professionals, should work collaboratively  
31  
32 to foster effective antibullying approaches.<sup>60</sup>  
33  
34  
35  
36  
37  
38  
39  
40

---

41  
42 <sup>1</sup> World Health Organization. Social determinants of health and well-being among  
43  
44 young people. Health Behaviour in School-aged Children (HBSC) study: international  
45  
46 report from the 2009/2010 survey. Health Policy for Children and Adolescents, No. 6.  
47  
48 2012. [https://www.euro.who.int/\\_\\_data/assets/pdf\\_file/0003/163857/Social-](https://www.euro.who.int/__data/assets/pdf_file/0003/163857/Social-determinants-of-health-and-well-being-among-young-people.pdf)  
49  
50 [determinants-of-health-and-well-being-among-young-people.pdf](https://www.euro.who.int/__data/assets/pdf_file/0003/163857/Social-determinants-of-health-and-well-being-among-young-people.pdf) [accessed 28  
51  
52 November 2020]

53  
54 <sup>2</sup> DS Hawker, MJ Boulton. Twenty years' research on peer victimization and  
55  
56 psychosocial adjustment: a meta-analytic review of cross-sectional studies. *Journal*  
57  
58 *of Child Psychology and Psychiatry* June 2000; 41(4): 441-455. DOI: 10.1111/1469-  
59  
60 7610.00629



1  
2  
3  
4  
5  
6  
7  
8  
9  
10  
11  
12  
13  
14  
15  
16  
17  
18  
19  
20  
21  
22  
23  
24  
25  
26  
27  
28  
29  
30  
31  
32  
33  
34  
35  
36  
37  
38  
39  
40  
41  
42  
43  
44  
45  
46  
47  
48  
49  
50  
51  
52  
53  
54  
55  
56  
57  
58  
59  
60

---

<sup>3</sup> The Lancet Psychiatry. Why be happy when you could be normal? *The Lancet Psychiatry* 01 October 2015; 2(10): 851. DOI: 10.1016/S2215-0366(15)00420-4

<sup>4</sup> D Olweus. Bully/victim problems among school children: some basic facts and effects of a school-based intervention program. In: D Pepler, K Rubin K. *The development and treatment of childhood aggression*. Hillsdale, NJ, Erlbaum, 1991: 411-448.

<sup>5</sup> WE Copeland, D Wolke, A Angold, et al. Adult psychiatric outcomes of bullying and being bullied by peers in childhood and adolescence. *JAMA Psychiatry* April 2013; 70: 419–426. DOI: 10.1001/jamapsychiatry.2013.504

<sup>6</sup> UNESCO. TCG4: Development of SDG thematic indicator 4.a.2. January 2018. <http://tcg.uis.unesco.org/wp-content/uploads/sites/4/2018/08/TCG4-41-Development-of-Indicator-4.a.2.pdf> [accessed 28 November 2020]

<sup>7</sup> UN News. Violence and bullying affect one in three students, education experts warn. 05 November 2020. <https://news.un.org/en/story/2020/11/1076932> [accessed 29 November 2020]

<sup>8</sup> D Wolke, N Tippett, S Dantchev. Bullying in the family: sibling bullying. *The Lancet Psychiatry* 01 October 2015; 2(10): 917-929. DOI: 10.1016/S2215-0366(15)00262-X

<sup>9</sup> I Rivers, PK Smith. Types of bullying behaviour and their correlates. *Aggressive Behaviour* 1994; 20(5): 359-368. DOI: 10.1002/1098-2337(1994)20:5<359::AID-AB2480200503>3.0.CO;2-J

<sup>10</sup> LE McMaster, J Connolly, D Peplar, WM Craig. Peer to peer sexual harassment in early adolescence: A developmental perspective. *Developmental Psychopathology* 2020; 14: 91-105. DOI: 10.1017/s0954579402001050

1  
2  
3  
4  
5  
6  
7  
8  
9  
10  
11  
12  
13  
14  
15  
16  
17  
18  
19  
20  
21  
22  
23  
24  
25  
26  
27  
28  
29  
30  
31  
32  
33  
34  
35  
36  
37  
38  
39  
40  
41  
42  
43  
44  
45  
46  
47  
48  
49  
50  
51  
52  
53  
54  
55  
56  
57  
58  
59  
60

---

<sup>11</sup> R Slonje, PH Smith. Cyberbullying: another main type of bullying? *Scandinavian Journal of Psychology* April 2008; 49(2): 147-54. DOI: 10.1111/j.1467-9450.2007.00611.x

<sup>12</sup> Olweus D. *Bullying at school: What we know and what we can do*. Oxford, UK: Blackwell; 1993.

<sup>13</sup> S Haug, RP Castro, M Kwon, et al. Smartphone use and smartphone addiction among young people in Switzerland. *Journal of Behavioral Addiction* 01 December 2015; 4(4): 299-307. DOI: 10.1556/2006.4.2015.037

<sup>14</sup> H Clark, AM Coll-Seck, A Banerjee, et al. A future for the world's children? A WHO–UNICEF–Lancet Commission. *The Lancet* 22 February 2020; 395(10224): 605-658. DOI: 10.1016/S0140-6736(19)32540-1

<sup>15</sup> F Sticca, S Perren. Is Cyberbullying Worse than Traditional Bullying? Examining the Differential Roles of Medium, Publicity, and Anonymity for the Perceived Severity of Bullying. *Journal of Youth and Adolescence* 2013; 42: 739-750. DOI: 10.1007/s10964-012-9867-3

<sup>16</sup> World Health Organization. Global school-based student health survey (GSHS). <https://www.who.int/ncds/surveillance/gshs/en/> [accessed 29 November 2020]

<sup>17</sup> World Health Organization Regional Office for Europe. Health Behaviour in School-aged Children (HBSC). <https://www.euro.who.int/en/health-topics/Life-stages/child-and-adolescent-health/health-behaviour-in-school-aged-children-hbsc> [accessed 29 November 2020]

<sup>18</sup> UNESCO. *Behind the numbers: Ending school violence and bullying*. 2019. <https://unesdoc.unesco.org/ark:/48223/pf0000366483> [accessed 27 November 2020]

1  
2  
3  
4  
5  
6  
7  
8  
9  
10  
11  
12  
13  
14  
15  
16  
17  
18  
19  
20  
21  
22  
23  
24  
25  
26  
27  
28  
29  
30  
31  
32  
33  
34  
35  
36  
37  
38  
39  
40  
41  
42  
43  
44  
45  
46  
47  
48  
49  
50  
51  
52  
53  
54  
55  
56  
57  
58  
59  
60

---

<sup>19</sup> International Association for the Evaluation of Educational Achievement. Progress in International Reading Literacy Study. <https://www.iea.nl/studies/iea/pirls> [accessed 29 November 2020]

<sup>20</sup> Organisation for Economic Co-operation and Development. Programme for International Student Assessment. <https://www.oecd.org/pisa/> [accessed 29 November 2020]

<sup>21</sup> A Harrison. Cyber-bullying: Horror in the home. *BBC News Online* 17 August 2013. <https://www.bbc.co.uk/news/education-23727673> [accessed 02 December 2020]

<sup>22</sup> P McGraw. It's time to stop the cyberbullying epidemic. *Huffington Post* 05 June 2015. [http://www.huffingtonpost.com/dr-phil/stop-cyberbullying\\_b\\_6647990.html](http://www.huffingtonpost.com/dr-phil/stop-cyberbullying_b_6647990.html) [accessed 02 December 2020]

<sup>23</sup> KL Modecki, J Minchin, AG Harbaugh, et al. Bullying Prevalence Across Contexts: A Meta-analysis Measuring Cyber and Traditional Bullying. *Journal of Adolescent Health* 01 November 2014; 55(5): 602-611. DOI: 10.1016/j.jadohealth.2014.06.007

<sup>24</sup> AK Przbylski, L Bowes. Cyberbullying and adolescent well-being in England: a population-based cross-sectional study. *The Lancet Child & Adolescent Health* 01 September 2017; 1(1): 19-26. DOI: [https://doi.org/10.1016/S2352-4642\(17\)30011-1](https://doi.org/10.1016/S2352-4642(17)30011-1)

<sup>25</sup> UNESCO. Third Regional Comparative and Explanatory Study on Education Quality (TERCE). 28 August 2015. [http://www.unesco.org/new/en/media-services/single-view/news/third\\_regional\\_comparative\\_and\\_explanatory\\_study\\_on\\_educatio/](http://www.unesco.org/new/en/media-services/single-view/news/third_regional_comparative_and_explanatory_study_on_educatio/) [accessed 30 November 2020]

<sup>26</sup> G Gini, T Pozzoli. Association between bullying and psychosomatic problems: a meta-analysis. *Pediatrics* March 2009; 123(3): 1059-1065. DOI: 10.1542/peds.2008-1215

- 1  
2  
3  
4  
5  
6 27 SE Moore, RE Norman, S Suetani. Consequences of bullying victimization in  
7 childhood and adolescence: A systematic review and meta-analysis. *World Journal*  
8 *of Psychiatry* 22 March 2017; 7(1): 60-76. DOI: 10.5498%2Fwjv.v7.i1.60  
9  
10  
11  
12  
13 28 MK Holt, AM Vivolo-Kantor, JR Polanin, et al. Bullying and suicidal ideation and  
14 behaviors: a meta-analysis. *Pediatrics* February 2015; 135(2): e496-e509. DOI:  
15 10.1542/peds.2014-1864  
16  
17  
18  
19  
20 29 M van Geel, P Vedder, J Tanilon. Relationship Between Peer Victimization,  
21 Cyberbullying, and Suicide in Children and Adolescents: A Meta-analysis. *JAMA*  
22 *Pediatrics* May 2014; 168(5): 435-442. DOI: 10.1001/jamapediatrics.2013.4143  
23  
24  
25  
26  
27 30 HL Fisher, TE Moffitt, RM Houts, et al. Bullying victimisation and risk of self harm  
28 in early adolescence: longitudinal cohort study. *BMJ* 26 April 2012; 344: e2683. DOI:  
29 10.1136%2Fbmj.e2683  
30  
31  
32  
33  
34 31 G Catone, S Marwaha, E Kuipers, et al. Bullying victimisation and risk of psychotic  
35 phenomena: analyses of British national survey data. *The Lancet Psychiatry* 01 July  
36 2015; 2(7): 618-624. DOI: 10.1016/S2215-0366(15)00055-3  
37  
38  
39  
40  
41 32 TR Nansel, M Overpeck, RS Pilla, et al. Bullying behaviors among US youth:  
42 prevalence and association with psychosocial adjustment. *JAMA* 25 April 2001;  
43 285(16): 2094-2100. DOI:10.1001/jama.285.16.2094  
44  
45  
46  
47  
48 33 TR Nansel, M Overpeck, DL Haynie, et al. Relationships Between Bullying and  
49 Violence Among US Youth. *Archives of Pediatric and Adolescent Medicine* April  
50 2003;157(4): 348-353. DOI:10.1001/archpedi.157.4.348  
51  
52  
53  
54  
55 34 Y Harel. A cross-national study of youth violence in Europe. *International Journal*  
56 *of Adolescent Medicine and Health* 01 July 1999, 11(3): 121-134. DOI:  
57 10.1515/IJAMH.1999.11.3-4.121  
58  
59  
60

- 1  
2  
3  
4 35 JJ Tang, Y Yu, HC Wilcox, et al. Global risks of suicidal behaviours and being  
5 bullied and their association in adolescents: School-based health survey in 83  
6 countries. *EClinicalMedicine* 01 February 2020; 19: 100253. DOI:  
7  
8 10.1016/j.eclinm.2019.100253.  
9  
10  
11  
12  
13 36 R Takizawa, B Maughan, L Arseneault. Adult health outcomes of childhood  
14 bullying victimization: evidence from a five-decade longitudinal British birth cohort.  
15 *American Journal of Psychiatry* July 2014; 171(7): 777-84. DOI:  
16  
17 10.1176/appi.ajp.2014.13101401  
18  
19  
20  
21  
22 37 J Juvonen, S Graham, MA Schuster. Bullying among young adolescents: the  
23 strong, the weak, and the troubled. *Pediatrics* December 2003; 112(6): 1231-7. DOI:  
24  
25 10.1542/peds.112.6.1231. PMID: 14654590.  
26  
27  
28  
29 38 RM Kowalski, SP Limber. Psychological, physical, and academic correlates of  
30 cyberbullying and traditional bullying. *Journal of Adolescent Health* July 2013;53(1  
31 Suppl): S13-20. DOI: 10.1016/j.jadohealth.2012.09.018  
32  
33  
34  
35 39 D Wolke, K Lee, A Guy. Cyberbullying: a storm in a teacup? *European Journal of*  
36 *Child & Adolescent Psychiatry* February 2017; 26: 899–908. DOI: 10.1007/s00787-  
37  
38 017-0954-6  
39  
40  
41  
42 40 D Wolke. Cyberbullying: how big a deal is it? *The Lancet Child & Adolescent*  
43 *Health* 01 September 2017; 1(1): 2-3. DOI: 10.1016/S2352-4642(17)30020-2  
44  
45  
46  
47 41 R Bannink, S Broeren, PM van de Looij-Jansen, et al. Cyber and Traditional  
48 Bullying Victimization as a Risk Factor for Mental Health Problems and Suicidal  
49 Ideation in Adolescents. *PLOS ONE* 09 April 2014. DOI:  
50  
51 10.1371/journal.pone.0094026  
52  
53  
54  
55  
56 42 AB Klomek, A Sourander, H Elonheimo. Bullying by peers in childhood and effects  
57 on psychopathology, suicidality, and criminality in adulthood. *The Lancet Psychiatry*  
58  
59 01 October 2015; 2(10):930-941. DOI: 10.1016/S2215-0366(15)00223-0  
60

- 
- 1  
2  
3  
4  
5  
6 43 JF Sigurdson, AM Undheim, JL Wallander, et al. The long-term effects of being  
7 bullied or a bully in adolescence on externalizing and internalizing mental health  
8 problems in adulthood. *Child and Adolescence Psychiatry and Mental Health* 23  
9 August 2015; 9: 42. DOI: 10.1186/s13034-015-0075-2  
10  
11  
12  
13  
14 44 L Bowes, C Joinson, D Wolke, L Glyn. Peer victimisation during adolescence and  
15 its impact on depression in early adulthood: prospective cohort study in the United  
16 Kingdom. *BMJ* June 2015; 350: h2469. DOI: 10.1136/bmj.h2469  
17  
18  
19  
20  
21 45 ST Lereya, WE Copeland, EJ Costello, et al. Adult mental health consequences of  
22 peer bullying and maltreatment in childhood: two cohorts in two countries. *The*  
23 *Lancet Psychiatry* 01 June 2015; 2(6): 524-531. DOI: 10.1016/S2215-  
24 0366(15)00165-0  
25  
26  
27  
28  
29  
30 46 T Biswas, JG Scott, K Munir, et al. Global variation in the prevalence of bullying  
31 victimisation amongst adolescents: Role of peer and parental supports.  
32 *EClinicalMedicine* 01 March 2020; 20: 100276. DOI: 10.1016/j.eclinm.2020.100276  
33  
34  
35  
36  
37 47 RC Vreeman, AE Carroll. A Systematic Review of School-Based Interventions to  
38 Prevent Bullying. *Archives of Pediatric and Adolescent Medicine* January 2007;  
39 161(1): 78–88. DOI:10.1001/archpedi.161.1.78  
40  
41  
42  
43  
44 48 D Olweus, SP Limber. Bullying in school: Evaluation and dissemination of the  
45 Olweus Bullying Prevention Program. *American Journal of Orthopsychiatry* 2010;  
46 80(1): 124-134. DOI: 10.1111/j.1939-0025.2010.01015.x  
47  
48  
49  
50  
51 49 CJ Ferguson, CS Miguel, JC Kilburn, et al. The effectiveness of school-based anti-  
52 bullying programs: A meta-analytic review. *Criminal Justice Review* 2007; 32(4):  
53 401-414. DOI: 10.1177/0734016807311712  
54  
55  
56 50 KW Merrell, BA Gueldner, SW Ross, et al. How effective are school bullying  
57 intervention programs? A meta-analysis of intervention research. *School Psychology*  
58 *Quarterly* 2008; 23:26-42. DOI: 10.1037/1045-3830.23.1.26  
59  
60

1  
2  
3  
4  
5  
6  
7  
8  
9  
10  
11  
12  
13  
14  
15  
16  
17  
18  
19  
20  
21  
22  
23  
24  
25  
26  
27  
28  
29  
30  
31  
32  
33  
34  
35  
36  
37  
38  
39  
40  
41  
42  
43  
44  
45  
46  
47  
48  
49  
50  
51  
52  
53  
54  
55  
56  
57  
58  
59  
60

---

<sup>51</sup> MJ Van Ryzin, CJ Roseth. Cooperative Learning in Middle School: A Means to Improve Peer Relations and Reduce Victimization, Bullying, and Related Outcomes. *Journal of Educational Psychology* 11 November 2018; 110(8): 1192-1201. DOI:10.1037/edu0000265

<sup>52</sup> M Arenson, PJ Hudson, N Lee, et al. The Evidence on School-Based Health Centers: A Review. *Global Pediatric Health* 19 February 2019; 6: 2333794X19828745. DOI: 10.1177/2333794X19828745

<sup>53</sup> Nursing Standard. School nurse numbers in UK fall by 30% since 2010. 22 August 2019. <https://rcni.com/nursing-standard/newsroom/news/school-nurse-numbers-uk-fall-30-2010-152546> [accessed 24 February 2021]

<sup>54</sup> DV Cioppa, A O'Neil, W Craig. Learning from traditional bullying interventions: A review of research on cyberbullying and best practice. *Aggression and Violent Behavior* July 2015; 23: 61-68. DOI: 10.1016/j.avb.2015.05.009

<sup>55</sup> UNESCO. International day against violence and bullying at school including cyberbullying. 04 November 2020.

<sup>56</sup> L Condon, V Prasad. GP views on their role in bullying disclosure by children and young people in the community: a cross-sectional qualitative study in English primary care. *British Journal of General Practice* November 2019; 69(688): e752-e759. DOI: 10.3399/bjgp19X706013

<sup>57</sup> Ditch the Label. <https://www.ditchthelabel.org> [accessed 03 December 2020]

<sup>58</sup> Anti-Bullying Alliance. <https://www.anti-bullyingalliance.org.uk/> [accessed 03 December 2020]

<sup>59</sup> Royal College of Nursing. The Best Start: The Future of Children's Health – One Year on. Valuing school nurses and health visitors in England. 14 May 2018.

---

1  
2  
3  
4 <https://www.rcn.org.uk/professional-development/publications/pdf-007000> [accessed  
5  
6 03 December 2020]  
7  
8

9  
10 <sup>60</sup> National Institute for Health and Care Excellence. Depression in children and  
11 young people: identification and management. NICE guideline [NG134]. 25 June  
12 2019. [https://www.nice.org.uk/guidance/ng134/chapter/Recommendations#step-3-](https://www.nice.org.uk/guidance/ng134/chapter/Recommendations#step-3-managing-mild-depression)  
13 [managing-mild-depression](https://www.nice.org.uk/guidance/ng134/chapter/Recommendations#step-3-managing-mild-depression) [accessed 03 December 2020]  
14  
15  
16  
17  
18  
19  
20  
21  
22  
23  
24  
25  
26  
27  
28  
29  
30  
31  
32  
33  
34  
35  
36  
37  
38  
39  
40  
41  
42  
43  
44  
45  
46  
47  
48  
49  
50  
51  
52  
53  
54  
55  
56  
57  
58  
59  
60
